# Supplementary material
Source: HighWire-hosted journal article supplement (https://ijgc.bmj.com/highwire/filestream/19136/field_highwire_adjunct_files/1/ijgc-2020-002315supp002_data_supplement.pdf)
Supplement: ijgc-2020-002315supp002_data_supplement.pdf [file ijgc-2020-002315supp002_data_supplement.pdf]

**Supplementary Table 2: Results of Delphi Round Three (Questionnaire 2)  
Level of consensus on steps (mandatory optional, prohibited) to complete a SLND.**

| <b>Domain</b>                                                                                                                                                                                                      | <b>Level of Consensus/Response</b>                    |
|--------------------------------------------------------------------------------------------------------------------------------------------------------------------------------------------------------------------|-------------------------------------------------------|
| Indigo-Cyanine Green (ICG) MUST be used for SLN Mapping in Endometrial Cancer. Adding blue dye or radiolabelled technetium is optional                                                                             | Agree 75.8%<br>Disagree 24.2%                         |
| Injection of ICG should be into the ectocervix in two or four positions                                                                                                                                            | Agree 87.9%<br>Disagree 12.1%                         |
| ICG Dilution 1.5mg/ml (dilute 25mg of ICG with 20ml sterile water). (In the survey, 59.4% of respondents answered mandatory; 37.5% optional; 3.1% prohibited/unwarranted)<br>Based on those results, please select | Mandatory 57.6%<br>Optional 42.4%                     |
| ICG Dilution 0.5mg/ml. (In the first survey, 6.3% of respondents answered mandatory; 40.6% optional; 53.1% prohibited/unwarranted) Based on those results, please select final response                            | Optional 51.5%<br>Prohibited 48.5%                    |
| Injection of ICG into the cervix should be done with a 20 to 25G needle (In the first survey, 20 to 25G needle diameter was within the 10-90th percentile responses)                                               | Agree 97.0%<br>Disagree 3.0%                          |
| Total volume of ICG injection should be 2ml total (In the first survey round, 28.1% of respondents answered mandatory, 46.9% answered optional; 25.0% answered prohibited/unwarranted)                             | Mandatory 18.2%<br>Optional 60.6%<br>Prohibited 21.2% |

|                                                                                                                                                                                                                            |                                                      |
|----------------------------------------------------------------------------------------------------------------------------------------------------------------------------------------------------------------------------|------------------------------------------------------|
| Total volume of ICG injection should be 4ml total (In the first survey, 50% of respondents answered mandatory, 40.6% optional; 9.4% prohibited/unwarranted)                                                                | Mandatory 39.4%<br>Optional 57.6%<br>Prohibited 3.0% |
| A 1ml syringe be used for ICG injection                                                                                                                                                                                    | Agree 54.5%<br>Disagree 45.5%                        |
| A 2ml syringe be used for ICG injection                                                                                                                                                                                    | Agree 54.5%<br>Disagree 45.5%                        |
| A 5ml syringe be used for ICG injection                                                                                                                                                                                    | Agree 48.5%<br>Disagree 51.5%                        |
| Superficial injection of ICG into the cervix is mandatory. A deep injection is optional                                                                                                                                    | Agree 63.6%<br>Disagree 36.4%                        |
| The needle and syringe used to inject ICG should be changed after each injection (In the first survey, 12.5% of respondents answered mandatory; 50.0% optional; 37.5% prohibited/unwarranted)                              | Mandatory 9.1%<br>Optional 66.7%<br>Prohibited 24.2% |
| The surgeon should inject ICG slowly (In the first survey, 65.6% of respondents stated slow injection is mandatory; 21.9% optional; 12.5% prohibited/unwarranted) each hemipelvis, the sentinel node that you remove is... | Mandatory 66.7%<br>Optional 30.3%<br>Prohibited 3.0% |
| The pace of injection does not matter (In the first survey, 18.8% of respondents answered mandatory; 21.9% optional; 59.4% prohibited/unwarranted)                                                                         | Mandatory 9.1%<br>Optional 36.4%<br>Prohibited 54.5% |
| The surgeon should aim for feeling of resistance (In the first                                                                                                                                                             | Mandatory 78.8%                                      |

|                                                                                                                                                                |                                                                                                                                                             |
|----------------------------------------------------------------------------------------------------------------------------------------------------------------|-------------------------------------------------------------------------------------------------------------------------------------------------------------|
| survey, 62.5% of respondents answered mandatory; 28.1% optional; 9.4% prohibited/unwarranted)                                                                  | Optional 18.2%<br>Prohibited 3.0%                                                                                                                           |
| The surgeon should aim to achieve sub-mucosal bleb (In the first survey, 40.6% of respondents answered mandatory; 50.0% optional; 9.4% prohibited/unwarranted) | Mandatory 45.5%<br>Optional 48.5%<br>Prohibited 6.1%                                                                                                        |
| The needle used to inject ICG should be long enough to ensure easy and accurate access to the injection sites on the ectocervix                                | Agree 100%<br>Disagree 0%                                                                                                                                   |
| ICG should be injected                                                                                                                                         | BEFORE establishing a pneumoperitoneum 39.4%<br>AFTER establishing a pneumoperitoneum 24.2%<br>EITHER before or after establishing a pneumoperitoneum 36.4% |
| If using a uterine manipulator, it is mandatory to insert it AFTER ICG injection                                                                               | Agree 90.6%<br>Disagree 9.4%                                                                                                                                |
| It is important to mobilise pelvic adhesions                                                                                                                   | BEFORE ICG injection 24.2%<br>AFTER ICG injection 33.3%<br>EITHER before or after ICG injection 42.4%                                                       |
| Is it necessary to undertake a staging inspection of abdomino-pelvic surfaces with white light                                                                 | BEFORE ICG injection 24.2%<br>AFTER ICG injection 27.3%                                                                                                     |

|                                                                                                                                                                                                                                                                             |                                                      |
|-----------------------------------------------------------------------------------------------------------------------------------------------------------------------------------------------------------------------------------------------------------------------------|------------------------------------------------------|
|                                                                                                                                                                                                                                                                             | EITHER before or after ICG injection 48.5%           |
| Identifying lymphatic channels and nodes: It is OPTIONAL to undertake near-infrared transperitoneal inspection of the common iliac, pre-sacral and para-aortic areas prior to commencing the dissection                                                                     | Agree 63.6%<br>Disagree 36.4%                        |
| Preserving or dividing of the round ligament for SLN mapping is OPTIONAL                                                                                                                                                                                                    | Agree 93.9%<br>Disagree 6.1%                         |
| Preserving or dividing of the IP ligament for SLN mapping is OPTIONAL                                                                                                                                                                                                       | Agree 90.9%<br>Disagree 9.1%                         |
| The pararectal space should be opened (In the first survey, 68.8% of respondents answered mandatory; 28.1% optional; 3.1% prohibited/unwarranted)                                                                                                                           | Mandatory 66.7%<br>Optional 33.3%<br>Prohibited 0%   |
| The superior vesical artery should be identified (mandatory/optional) or should not be identified (prohibited/unwarranted) during sentinel lymph node detection (In the first survey, 28.1% of respondents answered mandatory; 62.5% optional; 9.4% prohibited/unwarranted) | Mandatory 39.4%<br>Optional 60.6%<br>Prohibited 0%   |
| The uterine artery (medial to the ureter) should be identified (mandatory/optional) or should not be identified (prohibited/unwarranted) during sentinel lymph node detection (In the first survey, 34.4% of respondents                                                    | Mandatory 18.2%<br>Optional 78.8%<br>Prohibited 3.0% |

|                                                                                                                                                                                                                                                                                            |                                                      |
|--------------------------------------------------------------------------------------------------------------------------------------------------------------------------------------------------------------------------------------------------------------------------------------------|------------------------------------------------------|
| answered mandatory; 65.6% optional; 0% prohibited/unwarranted)                                                                                                                                                                                                                             |                                                      |
| The uterine artery (lateral to the ureter) should be identified (mandatory/optional) or should not be identified (prohibited/unwarranted) during sentinel lymph node detection (In the first survey, 37.5% of respondents answered mandatory; 56.3% optional; 6.2% prohibited/unwarranted) | Mandatory 39.4%<br>Optional 60.6%<br>Prohibited 0%   |
| The obturator nerve should be identified (mandatory/optional) or should not be identified (prohibited/unwarranted) during sentinel lymph node detection (In the first survey, 65.6% of respondents answered mandatory; 31.3% optional; 3.1% prohibited/unwarranted)                        | Mandatory 66.7%<br>Optional 30.3%<br>Prohibited 3.0% |
| Start SLN mapping at the level of the uterine artery and continue medially TOWARDS uterus (In the first survey round, 9.4% of respondents answered mandatory; 62.5% optional; 28.1% prohibited/unwarranted)                                                                                | Mandatory 0%<br>Optional 72.7%<br>Prohibited 27.3%   |
| Start SLN mapping at the level of the uterine artery and continue laterally AWAY from the uterus (In the first survey round, 65.6% of respondents answered mandatory; 21.9% optional; 12.5% prohibited/unwarranted)                                                                        | Mandatory 66.7%<br>Optional 33.3%<br>Prohibited 0%   |

|                                                                                                                                                                                                                  |                                                                                                         |
|------------------------------------------------------------------------------------------------------------------------------------------------------------------------------------------------------------------|---------------------------------------------------------------------------------------------------------|
| Start SLN mapping at the level of the uterine artery and continue towards the presacral areas (In the first survey round, 21.9% of respondents answered mandatory; 56.3% optional; 21.9% prohibited/unwarranted) | Mandatory 12.1%<br>Optional 78.8%<br>Prohibited 9.1%                                                    |
| Start SLN mapping at the most highlighted node and dissect proximally (TOWARDS cervix) (In the first survey round, 15.6% of respondents answered mandatory; 59.4% optional; 25.0% prohibited/unwarranted)        | Mandatory 6.1%<br>Optional 72.7%<br>Prohibited 21.2%                                                    |
| Start SLN mapping at the most highlighted node and dissect cephalad (AWAY from the cervix) (In the first survey round, 28.1% of respondents answered mandatory; 40.6% optional; 31.3% prohibited/unwarranted)    | Mandatory 0%<br>Optional 75.8%<br>Prohibited 24.2%                                                      |
| Retroperitoneal dissection CAN involve blunt or electro-surgical dissection techniques, gentle traction and/or clips                                                                                             | Agree 97.0%<br>Disagree 3.0%                                                                            |
| The most proximal node, irrespective of the nodal station in which the node is found (e.g. obturator, external iliac, para-aortic)                                                                               | Agree 90.9%<br>Disagree 9.1%                                                                            |
| A sentinel node(s) should be defined as....                                                                                                                                                                      | Single mapped node 65.6%<br>The most proximal node plus the next station (station 2) echelon nodes 9.4% |

|                                                                                                                                                                                                                                                                                                                                                                                                                              |                                   |
|------------------------------------------------------------------------------------------------------------------------------------------------------------------------------------------------------------------------------------------------------------------------------------------------------------------------------------------------------------------------------------------------------------------------------|-----------------------------------|
|                                                                                                                                                                                                                                                                                                                                                                                                                              | All mapped (green) nodes<br>25.0% |
| Sentinel lymph node dissection/excision should be completed in one hemi-pelvis before proceeding to the contralateral side (In the first survey, 53.1% of respondents answered mandatory; 37.5% optional; 9.4% prohibited/unwarranted)                                                                                                                                                                                       | Agree 87.5%<br>Disagree 12.5%     |
| Troubleshooting when 'no nodes are mapped' In the event that no nodes are mapped, activating any combination of the following troubleshooting strategies is OPTIONAL: -<br>Wait. Undertake dissection on the contralateral side before returning to original side - Extend retroperitoneal dissection to encompass common, pre-sacral and/or paraaortic areas -<br>Re-inject ICG - Undertake a side-specific lymphadenectomy | Agree 97.0%<br>Disagree 3.0%      |
| Specimen extraction It is MANDATORY to extract sentinel nodes using any of the following containment techniques:<br>endo-catch bag finger of sterile glove, laparoscopic 'cup forceps' contained extraction via port, contained extraction via colpotomy                                                                                                                                                                     | Agree 97.0%<br>Disagree 3.0%      |
| Specimen labelling It is MANDATORY to label sentinel nodal tissue according to laterality (right/left) and nodal station                                                                                                                                                                                                                                                                                                     | Agree 100%<br>Disagree 0%         |

|                                                                                  |  |
|----------------------------------------------------------------------------------|--|
| (obturator/external iliac/internal iliac/presacral/common<br>iliac/aortic/caval) |  |
|----------------------------------------------------------------------------------|--|
